# Supplementary material for: A novel mussel-inspired strategy toward superhydrophobic surfaces for self-driven crude oil spill cleanup
Source: Royal Society of Chemistry journal article supplement (doi:10.1039/c5ta01767j), 2015-01-01
Supplement: c5ta01767j1.pdf [file c5ta01767j1.pdf]

## Supporting Information

### **A Novel Mussel-Inspired Strategy toward Superhydrophobic Surface for Self-Driven Crude Oil Spill Cleanup**

Zhenxing Wang,<sup>a</sup> Yanchao Xu,<sup>a</sup> Yuyan Liu,<sup>a</sup> and Lu Shao<sup>\*a</sup>

<sup>a</sup> *School of Chemical Engineering and Technology, State Key Laboratory of Urban Water Resource and Environment (SKLUWRE), Harbin Institute of Technology, Harbin 150001, PR China.*

\* E-mail address of corresponding author:

\*Prof. L. Shao      E-mail: shaolu@hit.edu.cn

### 1. The influence of the concentration of FA.

Formation and collection of nanoparticles (NPs): Dopamine hydrochloride (DA, 0.2 g) and different amount of folic acid (FA, 0 g, 0.1 g and 0.2 g) were added into deionized water (100 mL) and stirred for 18 h at 60 °C (**Stage I**). Then the pH of the mixture was tuned to 8.5 by HCl-Tris followed by stirring for 12 h at room temperature (**Stage II**). Finally, those nanoparticles formed in different solutions were thoroughly washed and then collected by centrifugation, and dried at 50°C until the weight is constant. The weight of those nanoparticles was recorded respectively for comparison.

**Table S1** Weight of nanoparticles (NPs) collected from DA solution and DA/FA solution with different amount of FA.

| Nanoparticles (NPs) | DA (mg mL <sup>-1</sup> ) | FA (mg mL <sup>-1</sup> ) | Stage I (h) | Stage II (pH) | Weight of NPs (mg) |
|---------------------|---------------------------|---------------------------|-------------|---------------|--------------------|
| NPs-0               |                           | 0                         |             |               | 78                 |
| NPs-1               | 2                         | 0.5                       | 18          | pH=8.5        | 65                 |
| NPs-2               |                           | 1                         |             |               | 52                 |
| NPs-3               |                           | 2                         |             |               | 28                 |

## 2. Characterization of the NPs-0 and NPs-2

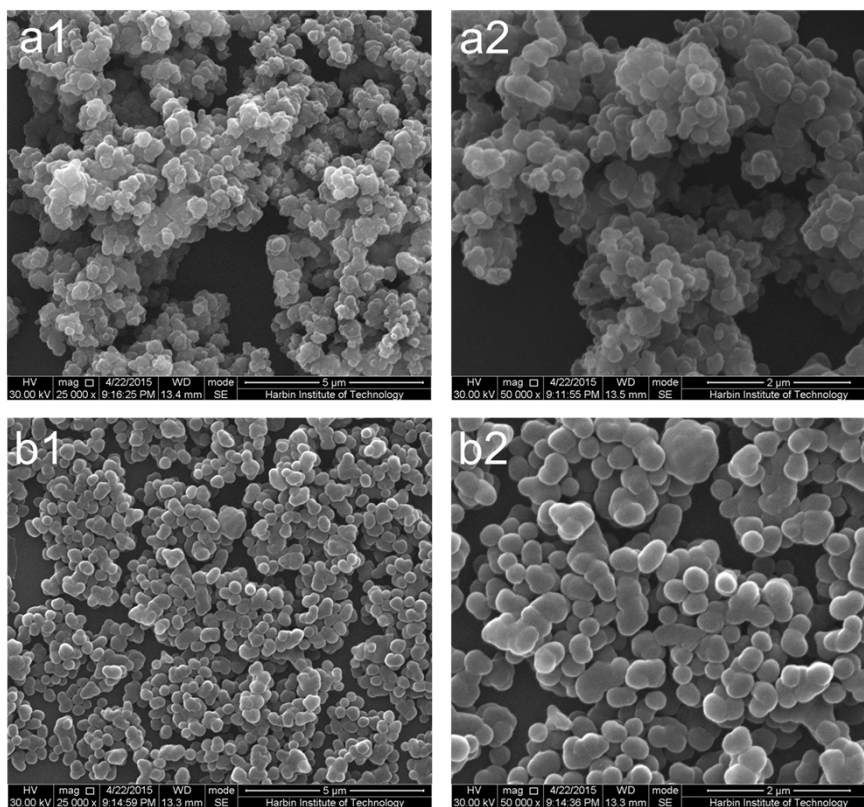

**Fig. S1** SEM images of (a) NPs-0 and (b) NPs-2. (1-Low magnification; 2-High magnification. The detailed formation conditions of these nanoparticles have been shown in Table S1.)

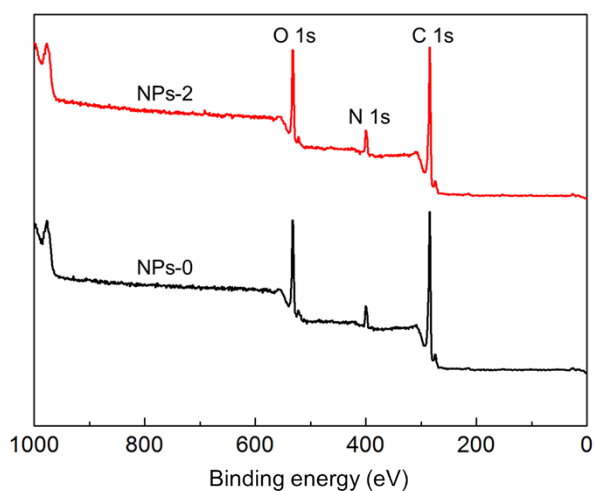

**Fig. S2** XPS spectra of (a) NPs-0 and (b) NPs-2. (The detailed formation conditions of these nanoparticles have been shown in Table S1.)

**Table S2** Elemental compositions of (a) NPs-0 and (b) NPs-2.

| Nanoparticles (NPs) | Composition (At.%) |     |      |      |
|---------------------|--------------------|-----|------|------|
|                     | C                  | N   | O    | N/C  |
| NPs-0               | 73.8               | 6.8 | 18.4 | 0.09 |
| NPs-2               | 72.6               | 7.7 | 19.7 | 0.11 |

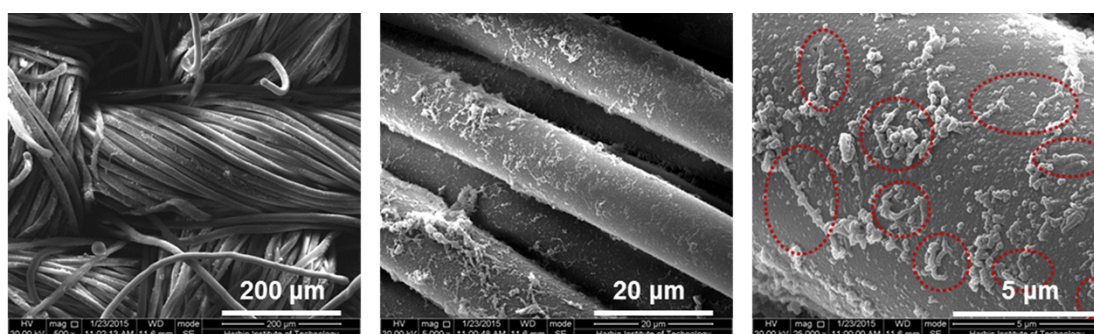

**Fig. S3** SEM images of the fabric treated by DA/FA solution. The duration of Stage I is 18h. (The modification process of the fabric is same to that used to prepare Fabric-4, excepting the concentration of DA and FA. The concentration of DA and FA is 1 mg mL<sup>-1</sup> and 0.5 mg mL<sup>-1</sup>, respectively.)

### 3. Water contact angle of the pristine fabric

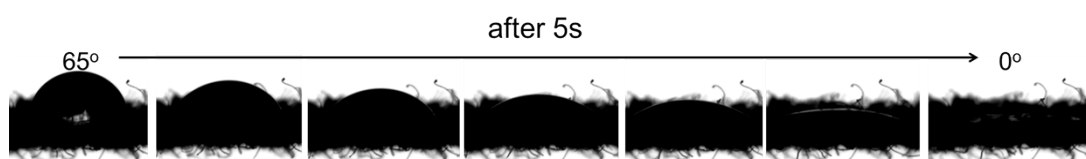

**Fig. S4** Change of the water contact angle of the pristine fabric with the drop ages.

As shown in Fig.S5, the water contact angle of the pristine fabric (Fabric-0) is about 65°, and the water droplet can easily permeate into the pristine fabric in 5s.
